# Supplementary material for: 3D graphene supported MoO2 for high performance binder-free lithium ion battery
Source: Royal Society of Chemistry journal article supplement (doi:10.1039/c4nr01744g), 2014-01-01
Supplement: c4nr01744g1.pdf [file c4nr01744g1.pdf]

Supporting Information

## 3D Graphene Supported MoO<sub>2</sub> for High Performance Binder-free

### Lithium Ion Battery

Zhi Xiang Huang, Ye Wang, Yun Guang Zhu, Yumeng Shi, Jen It Wong, and Hui Ying

Yang\*

Pillar of Engineering Product Development, Singapore University of Technology and

Design, 20 Dover Drive, Singapore 138682.

E-mail: [yanghuiying@sutd.edu.sg](mailto:yanghuiying@sutd.edu.sg)

### Supporting Information

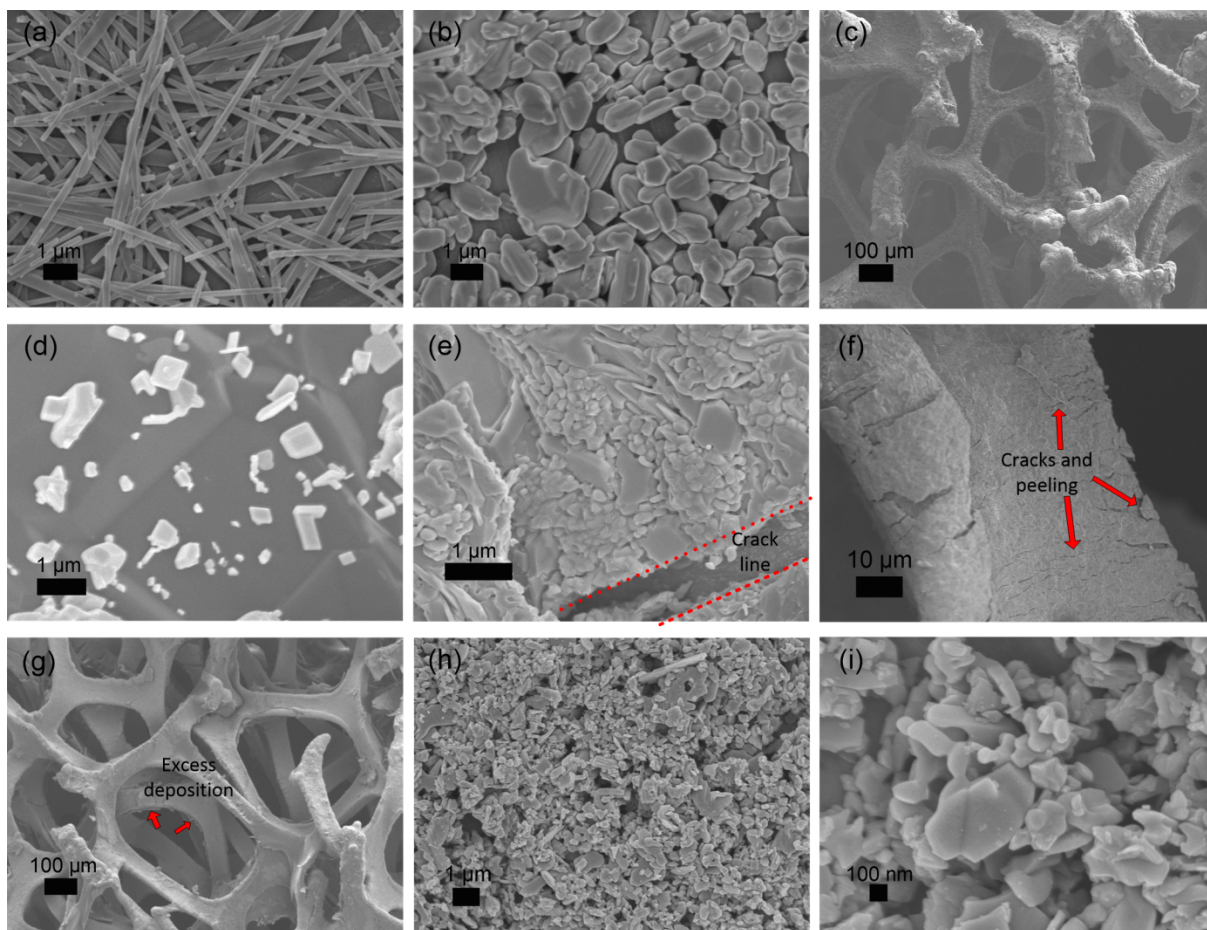

**Figure S1.** (a) SEM image of precursor MoO<sub>3</sub> nanobelts. (b) SEM image of bulk MoO<sub>3</sub>. SEM images of MoO<sub>2</sub> on 3DG foam using bulk MoO<sub>3</sub> at (c) low magnification and (d)

high magnification. SEM images of MoO<sub>2</sub> on Ni foam at different magnifications, (e) high magnification showing agglomeration of MoO<sub>2</sub> particles, and (f) to (g) low magnification showing thick MoO<sub>2</sub> depositions with cracks and peels. SEM images of bulk MoO<sub>2</sub>, (h) low magnification, and (i) high magnification.

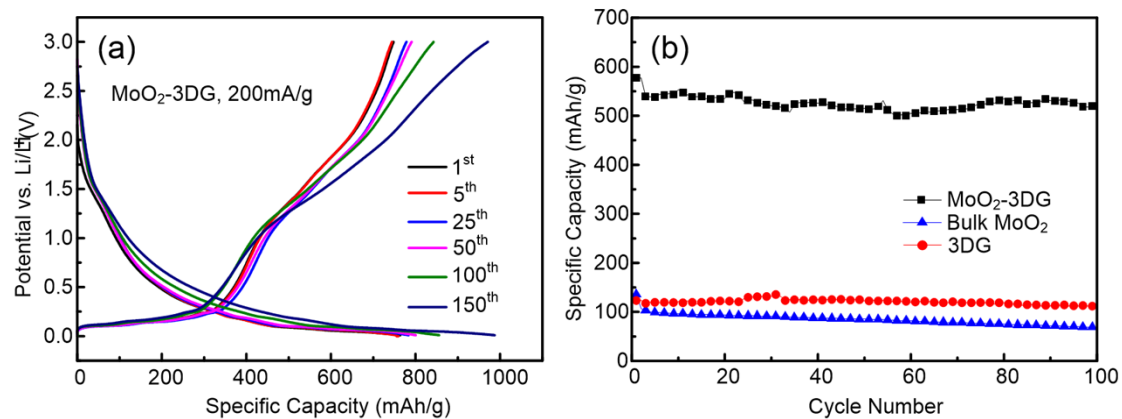

**Figure S2.** (a) Galvanostatic discharge and charge curves for MoO<sub>2</sub>-3DG electrodes at the 1<sup>st</sup>, 5<sup>th</sup>, 25<sup>th</sup>, 50<sup>th</sup>, 100<sup>th</sup>, and 150<sup>th</sup> cycles at a current density of 200 mA g<sup>-1</sup> in the potential range of 0.01 to 3.0 V. (b) Cycling performance of MoO<sub>2</sub>-3DG, bulk MoO<sub>2</sub> and as-prepared 3DG electrodes at current density of 1000 mA g<sup>-1</sup>.

**Table S1** – Fitting results of the EIS curves in **Fig 5(a)** using the equivalent circuit.

| Sample                | $R_s$ ( $\Omega$ ) | $R_f$ ( $\Omega$ ) | $R_{ct}$ ( $\Omega$ ) |
|-----------------------|--------------------|--------------------|-----------------------|
| Bulk MoO <sub>2</sub> | 8                  | 82                 | 64                    |
| MoO <sub>2</sub> -3DG | 5                  | 56                 | 27                    |
